# Supplementary material for: Measuring health-related quality of life in patients with advanced cancer: a systematic review of self-administered measurement instruments
Source: Springer Nature journal article supplement (doi:10.1007/s11136-018-1809-4), 2018-02-09
Supplement: MOESM1 [file 15457182]

**Supplement 1.** Keyword search string

| **Topic** | **Keywords** |
| --- | --- |
| Palliative | ("Palliative Care/psychology"[MAJOR] OR Palliative care [MH] OR Palliative Medicine [MH] OR palliative [ALL] OR palliat* [ALL] OR Terminal care [MH] or terminal [ALL] OR Terminally ill [MH] OR “end of life” [TW] OR Hospice Care [MH] OR “advanced cancer” [TW] OR “life-sustaining” [TW] OR “proximity to death” [TW] OR "neoplasm metastasis"[MeSH Terms] OR "metastasis"[All Fields] OR "metastases"[All Fields] OR "metastatic"[All Fields] OR "metastasized"[All Fields] OR “end stage cancer” [TW] OR “advanced stage cancer”[TW]) |
| Measurement instruments | (Validation Studies [PTYP] OR "validation studies as topic"[MH] OR validation studies [TW] OR Psychometrics [MH] OR Surveys and Questionnaires [MH] OR Sensitivity and Specificity[MH] OR Reproducibility of Results [MH] OR validity [TW] OR responsiveness [TW] OR reliability [TW] OR measurement error [TW] OR “reproducibility of results” [TW] OR psychometrics [TW] OR clinimetric [TW]) OR ((Validation Studies [PTYP]) AND (“Brief Hospice Inventory”[TW] OR Cambridge Palliative Audit Schedule[TW] OR “Demoralization Scale”[TW] OR “Edmonton Functional Assessment Tool”[TW] OR Emanuel and Emanuel Medical Directive [TW] OR “EORTC-QLQ” [TW] OR “ESAS” [TW] OR “FACIT-PAL” [TW] OR “HQLI” [TW] OR “Life Closure Scale” [TW] OR “Life Evaluation Questionnaire” [TW] OR McMaster Quality of Life Scale [TW] OR “McGill Quality of Life Questionnaire” [TW] OR McCanse Readiness for Death Instrument [TW] OR “Memorial Symptom Assessment Scale” [TI] OR “Condensed Memorial Symptom Assessment Scale” [TW] OR “MSAS-GDI” [TW] OR “MVQOLI” [TW] OR “NA-ACP” [TW] OR “Patient Dignity Inventory” [TW] OR Problems and Needs in Palliative Care questionnaire [TW] OR “Palliative care Outcome Scale” [TW] OR “QODD” [TW] OR “QUAL-E” [TW] OR Spiritual Needs Inventory [TW])) |
| Quality of life | (Quality of life [MH] OR quality of life OR QOL[TW]) |
| Publication type | NOT ("addresses"[Publication Type] OR "biography"[Publication Type] OR "case reports"[Publication Type] OR "clinical trial"[Publication Type] OR "clinical trial, phase i"[Publication Type] OR "clinical trial, phase ii"[Publication Type] OR "clinical trial, phase iii"[Publication Type] OR "clinical trial, phase iv"[Publication Type] OR "comment"[Publication Type] OR "comparative study"[Publication Type] OR "congresses"[Publication Type] OR "consensus development conference"[Publication Type] OR "controlled clinical trial"[Publication Type] OR "editorial"[Publication Type] OR "electronic supplementary materials"[Publication Type] OR "guideline"[Publication Type] OR "historical article"[Publication Type] OR "introductory journal article"[Publication Type] OR "lectures"[Publication Type] OR "letter"[Publication Type] OR "meta analysis"[Publication Type] OR "practice guideline"[Publication Type] OR "publication components"[Publication Type] OR "randomized controlled trial"[Publication Type] OR "retracted publication"[Publication Type] OR "retraction of publication"[Publication Type] ) |
