# Supplementary material for: Measuring health-related quality of life in patients with advanced cancer: a systematic review of self-administered measurement instruments
Source: Springer Nature journal article supplement (doi:10.1007/s11136-018-1809-4), 2018-02-09
Supplement: MOESM2 [file 15457182]

**Supplement 2.** Quality Criteria for Measurement Properties

| **Property** | **Quality criteria** | |
| --- | --- | --- |
| Content validity | + | A clear description is provided of the measurement aim, the target population, the concepts that are being measured and the item selection AND target population AND (investigators OR experts) were involved in item selection AND a full copy of the instrument should be available |
| ? | A clear description of above mentioned aspects is lacking OR only target population involved OR doubtful design or method OR a full copy of the instrument is lacking; |
| - | No target population involvement; |
| 0 | No information found on target population involvement. |
| Construct validity | + | Specific hypotheses were formulated AND at least 75% of the results are in accordance with these hypotheses |
| ? | Doubtful design or method (e.g. no hypotheses) |
| - | Less than 75% of hypotheses were confirmed, despite adequate design and methods |
| 0 | No information found on construct validity |
| Internal consistency | + | Factor analyses performed on adequate sample (7* number of items AND >100) (to assess unidimensionality) AND Cronbach's alpha calculated per dimension AND Cronbach's alpha between 0.7 – 0.95 |
| ? | No factor analysis OR doubtful design (1) |
| - | Cronbach's alpha <0.7 or >0.95, despite adequate design and method (2) |
| 0 | No information found on internal consistency |
| Reliability | + | ICC or weighted Kappa >0.7 AND time interval at least one week (3) |
| ? | Doubtful design or method (e.g. spearman or no two measurements; administrations should be independent, time interval not mentioned, time interval not appropriate, patients were not stable in the interim period, test conditions for both measurements were not comparable (administration, environment, instructions)) |
| - | ICC or weighted Kappa <0.7, despite adequate design and method |
| 0 | No information found on reliability |
| Absolute measurement error | + | SEM or MIC < SDC OR MIC outside the LOA OR convincing arguments that the measurements error is acceptable |
| ? | Doubtful design or method (e.g. not two independent measurements, patient not stable in interim period, no appropriate time interval (recall bias), test conditions similar) (OR SEM or MIC not defined AND no convincing argument that the measurement error is acceptable) |
| - | SEM >= MIC or SDC ≥ MIC or MIC equals or inside LOA OR RR <= 1.96 OR AUC<0.7, despite adequate design and methods |
| 0 | No information on absolute measurement error |
| Responsiveness | + | Specific hypotheses were formulated AND at least 75% of the results are in accordance with these hypotheses AND at least two measurements are available AND the time interval is described OR SDC<MIC or MIC outside the LOA or RR >0.96 OR AUC>=0.7 |
| ? | Doubtful design or method (e.g., no hypotheses) |
| - | Less than 75% of hypotheses were confirmed, despite adequate design and methods OR SDC>=MIC or MIC equals or inside LOA OR RR<=1.96 OR AUC<0.7, despite adequate design and method |
| 0 | No information on responsiveness |
| Interpretability | + | Subgroups of patients AND MIC defined AND no floor/ceiling effects were present |
| ? | Doubtful design or method OR no subgroups OR no MIC defined OR floor/ceiling effects were present |
| 0 | No information found on interpretability |

Abbreviations: ICC = intraclass correlation SEM = standard error of measurement; MIC = minimal important change; SDC = smallest detectable change; LOA = limits of agreement; AUC = area under the curve; RR = responsiveness ratio.
ª + = positive rating; ? = indeterminate rating; - = negative rating; 0 = no information available.
b Doubtful design or method = lacking of a clear description of the design or methods of the study, sample size smaller than 50 subjects (should be at least 50 in every (subgroup) analysis), or no clear description of handling of (%) missing items or any important methodological weakness in the design or execution of the study (e.g., only included complete patients (selection bias); comparison of long and short version when responses of short were obtained with the longer version).
(1) 75% of Cronbach’s alphas between 0.70 and 0.90 AND no Cronbach’s alpha <0.50
(2) <75% of Cronbach’s alphas between 0.70 and 0.90 OR Cronbach’s alpha <0.50
(3) time interval at least one week OR less than one week when the instrument contains 30 or more items OR less than one week when convincing arguments were given that the time interval was appropriate (to avoid recall bias).
